# Supplementary material for: Conformational chiral polymorphism in cis-bis-triphenylphosphine complexes of transition metals
Source: Royal Society of Chemistry journal article supplement (doi:10.1039/c8ce00337h), 2018-01-01
Supplement: c8ce00337h1.pdf [file c8ce00337h1.pdf]

Supplementary material

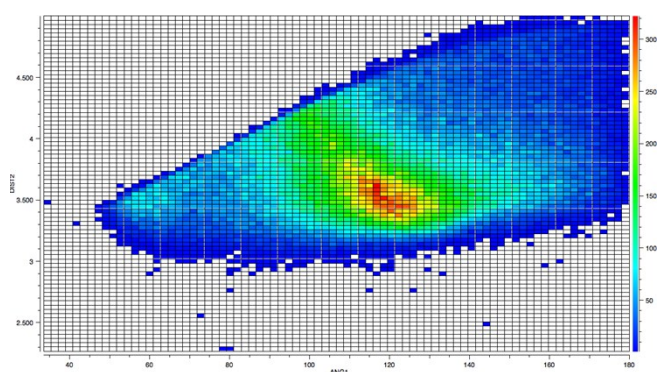

*Ar-H ... OC-M distances and C-H...O angles from the CSD*

**Fig. S1** C-H...OC distance and C-H...OC angles for aromatic C-H entities and carbonyl complexes.
